# Supplementary material for: Transplanted Murine Tumours SPECT Imaging with <sup>99m</sup>Tc Delivered with an Artificial Recombinant Protein
Source: Preprints.org preprint supplement (doi:10.20944/preprints202408.0697.v1), 2024-08-09
Supplement: Supplementary file 1 [file supplementary]

## Sheet: 1
Kinetics of SUV changing in key organs of healthy mice after administrating 99mTc-E1b complex or 99mTc pertechnetate determined by SPECT/CT
SUV values are shown in the form of separate tables for each organ. On the left are tables related to 99mTc-E1b, on the right - to 99mTc-pertechnetate.
99mTc-E1b										99mTc pertechnetate
Heart	Mouse						Mean value	Standard deviation		Heart	Mouse						Mean value	Standard deviation
T, min	1	2	3	4	5	6				T, min	1	2	3	4	5	6
5	2.85954	3.55084	3.53582	4.2668	3.05259	3.52785	3.5	0.5		5	1.96675	2.46668	1.69568	2.52396	1.99598	1.95883	2.1	0.3
20	1.7272	2.14235	1.79544	2.05832	2.69414	2.05337	2.1	0.3		20	1.02182	1.36588	1.1406	1.16172	1.42677	0.923324	1.2	0.2
40	1.23718	1.76158	1.08805	1.06045	1.92487	1.24819	1.4	0.4		40	0.945914	0.691492	0.686127	0.638496	0.967468	0.654584	0.8	0.2
120	0.35632	0.301149	0.64173	0.900157	0.862114	0.764277	0.6	0.3		120
180	0.452548	0.29818	0.32623	0.308213	0.547396	0.683514	0.4	0.2		180	0.811716	0.678413	0.752125	0.784127	0.850356	0.593957	0.7	0.1
360	0.189349	0.0839315	0.0672686	0.0141426	0.0260208	0.242577	0.1	0.1		360
1440	0.0667679	0.0510992	0.224381	0.0589387	0.147363	0.0603908	0.1	0.1		1440	0.0488527	0.0474469	0.0440417	0.0439427	0.0532328	0.0365041	0.05	0.01
Lungs	Mouse						Mean value	Standard deviation		Lungs	Mouse						Mean value	Standard deviation
T, min	1	2	3	4	5	6				T, min	1	2	3	4	5	6
5	1.72212	1.73481	1.88131	1.60316	2.0853	1.87922	1.8	0.2		5	1.72039	1.46022	0.989607	1.37734	1.06283	1.41429	1.3	0.3
20	1.0558	1.37325	1.83875	1.15385	0.936879	0.854022	1.2	0.4		20	0.907152	0.710814	0.818986	1.31584	0.736917	0.931192	0.9	0.2
40	0.571855	1.07607	1.09309	0.974461	0.504146	0.834802	0.8	0.3		40	0.948917	0.624919	0.305236	0.407486	0.560694	0.515742	0.6	0.2
120	0.132342	0.252188	0.552147	0.501231	0.217494	0.329288	0.3	0.2		120
180	0.101101	0.0790931	0.392048	0.374317	0.077254	0.0640872	0.2	0.2		180	0.455706	0.40543	0.308463	0.39532	0.405829	0.462859	0.4	0.1
360	0.0815608	0.0713313	0.0698294	0.0966396	0.0699411	0.0334683	0.07	0.02		360
1440	0.0271379	0.046035	0.0107557	0.069528	0.0560356	0.0193496	0.04	0.02		1440	0.0483587	0.0558966	0.0216344	0.042832	0.0383156	0.0172544	0.04	0.02
Liver	Mouse						Mean value	Standard deviation		Liver	Mouse						Mean value	Standard deviation
T, min	1	2	3	4	5	6				T, min	1	2	3	4	5	6
5	1.79984	1.57596	1.81915	1.64698	2.05097	1.98486	1.8	0.2		5	1.6946	1.70706	1.99806	1.479	1.42817	1.25396	1.6	0.3
20	1.32631	0.921991	1.2276	1.52389	1.22971	1.34538	1.3	0.2		20	1.66493	1.42631	1.92688	1.55101	1.45737	0.811943	1.5	0.4
40	1.03621	0.892823	1.16825	0.850561	0.876787	0.930669	1	0.1		40	1.30972	1.44447	1.5071	1.56299	1.33174	1.14721	1.4	0.2
120	0.707953	0.564935	0.62773	0.707807	0.668927	0.856667	0.7	0.1		120
180	0.525244	0.444394	0.505305	0.620674	0.537337	0.713513	0.6	0.1		180	0.391575	0.899581	0.588263	0.961731	0.668056	1.0001	0.8	0.2
360	0.429595	0.426202	0.418262	0.581429	0.593284	0.600654	0.5	0.1		360
1440	0.31165	0.3052	0.222783	0.354784	0.237299	0.16625	0.3	0.1		1440	0.187101	0.0933772	0.108496	0.0601177	0.0253156	0.0177037	0.1	0.1
Kidneys	Mouse						Mean value	Standard deviation		Kidneys	Mouse						Mean value	Standard deviation
T, min	1	2	3	4	5	6				T, min	1	2	3	4	5	6
5	14.0388	14.1014	13.3338	11.9053	14.5997	15.7484	14	1		5	1.24325	1.80992	1.55569	1.45693	1.04805	1.26374	1.4	0.3
20	17.7758	16.3162	21.7662	18.7325	19.05	16.3899	18	2		20	1.06683	0.685033	1.16969	0.801055	0.397316	1.2046	0.9	0.3
40	19.2067	17.539	19.3176	15.3604	18.2299	17.0231	18	1		40	0.754962	0.513786	0.825362	0.707765	0.316151	0.874917	0.7	0.2
120	29.1541	27.272	20.1001	18.3692	30.3831	18.8273	24	6		120
180	28.8475	22.5698	19.4797	16.0628	24.9878	19.5157	22	5		180	0.609289	0.560465	0.602842	0.576307	0.442505	0.723796	0.6	0.1
360	28.7807	9.119	20.8016	27.9678	22.0258	20.779	22	7		360
1440	13.3363	11.5355	13.7466	12.6472	13.694	14.1019	13	1		1440	0.15682	0.0106849	0.0148483	0.0156698	0.141061	0.139328	0.1	0.1
Stomach	Mouse						Mean value	Standard deviation		Stomach	Mouse						Mean value	Standard deviation
T, min	1	2	3	4	5	6				T, min	1	2	3	4	5	6
5	0.557704	0.468601	0.318129	0.538965	0.453397	0.569497	0.5	0.1		5	4.27889	4.20548	6.52892	4.32179	2.22342	5.71458	5	1
20	0.478751	0.320901	0.15969	0.258597	0.25923	0.272504	0.3	0.1		20	6.18264	5.70322	9.42617	5.7623	7.31635	8.14285	7	1
40	0.188752	0.187992	0.157549	0.220847	0.362829	0.186287	0.2	0.07		40	12.2427	10.3968	11.1761	14.5412	11.8508	14.2833	12	2
120	0.187376	0.152783	0.0335349	0.123539	0.100568	0.0769433	0.1	0.05		120
180	0.157961	0.131048	0.048217	0.141248	0.139702	0.194533	0.1	0.05		180	23.1244	22.981	22.2605	25.5154	25.9038	21.8316	24	2
360	0.08053	0.0727342	0.0858863	0.0780231	0.0716605	0.0826393	0.08	0.01		360
1440	0.0437197	0.0481236	0.060268	0.030441	0.04135	0.0725635	0.05	0.01		1440	1.97622	1.10137	1.61529	1.35245	1.05349	1.35479	1.4	0.3
Neck (thyroid and salivary gland area)										Neck (thyroid and salivary gland area)
	Mouse						Mean value	Standard deviation			Mouse						Mean value	Standard deviation
T, min	1	2	3	4	5	6				T, min	1	2	3	4	5	6
5	0.153252	0.279683	0.166709	0.220589	0.301957	0.204588	0.2	0.1		5	1.72713	6.81221	2.67769	7.7754	5.85045	6.31171	5	2
20	0.116804	0.276645	0.136386	0.262016	0.232534	0.209627	0.2	0.1		20	6.67613	10.2289	8.70406	9.56191	9.61857	11.1873	9	2
40	0.0518736	0.0540611	0.166967	0.196891	0.211488	0.0399134	0.1	0.1		40	10.4401	11.5182	11.4859	12.7481	13.7591	10.2858	12	1
120	0.100984	0.122724	0.0665179	0.167523	0.19605	0.072234	0.1	0.1		120
180	0.0115925	0.0312393	0.0962228	0.0938333	0.0367252	0.0855609	0.06	0.04		180	26.4262	20.799	27.3339	19.7237	21.5701	24.9735	23	3
360	0.0360288	0.0111786	0.0188369	0.0209135	0.0244006	0.0262561	0.02	0.01		360
1440	0.00708349	0.0202835	0.00882122	0.024009	0.0208644	0.0124839	0.02	0.01		1440	0.934495	1.24093	0.648798	0.73308	0.823522	1.11998	0.9	0.2
Muscle	Mouse						Mean value	Standard deviation		Muscle	Mouse						Mean value	Standard deviation
T, min	1	2	3	4	5	6				T, min	1	2	3	4	5	6
5	0.451624	0.254367	0.295229	0.251633	0.327938	0.354533	0.3	0.1		5	0.258618	0.133004	0.372379	0.339188	0.493908	0.369195	0.3	0.1
20	0.278929	0.239345	0.213092	0.0997139	0.183676	0.255976	0.2	0.1		20	0.124857	0.343916	0.427097	0.0683942	0.183987	0.0424004	0.2	0.2
40	0.19054	0.245882	0.239093	0.0935701	0.116607	0.108306	0.17	0.07		40	0.243486	0.310004	0.308713	0.212382	0.154598	0.147084	0.2	0.1
120	0.032518	0.0651084	0.131211	0.0407026	0.0171125	0.110555	0.07	0.05		120
180	0.0982684	0.0133067	0.097846	0.0849524	0.0101623	0.0112675	0.05	0.05		180	0.080426	0.144017	0.177289	0.177423	0.129735	0.0271145	0.1	0.1
360	0.0286183	0.0271199	0.0143801	0.0250659	0.0480752	0.0332578	0.03	0.01		360
1440	0.0355504	0.0287214	0.0297985	0.00487374	0.0148514	0.0260417	0.02	0.01		1440	0.00865124	0.00756364	0.00286308	0.00813717	0.0206159	0.0322528	0.01	0.01
